# Supplementary material
Source: PubMed Central journal article supplement (PMC2849109)

## Supporting Information

# Design and Synthesis of Potential New Apoptosis Agents: Hybrid Compounds Containing Perillyl Alcohol And New Constrained Retinoids

Bhaskar C. Das,<sup>a, b\*</sup> Sakkarapalayam M . Mahalingam,<sup>b</sup>

Lipsa Panda<sup>b</sup>, Bo Wang<sup>b</sup>, Phill Campbell<sup>b</sup>, and Todd Evans<sup>c</sup>

*Department of Nuclear Medicine, Albert Einstein College of Medicine, Bronx, NY 10461, USA*

*<sup>b</sup>Department of Developmental & Molecular Biology, Albert Einstein College of Medicine, Bronx, NY 10461, USA*

*<sup>c</sup>Department of Surgery, Weill Cornell Medical College, Cornell University, New York, NY-10021.*

[bdas@aecom.yu.edu](mailto:bdas@aecom.yu.edu)

|                                               |     |
|-----------------------------------------------|-----|
| General considerations.....                   | S2  |
| <sup>1</sup> H NMR spectra of <b>1</b> .....  | S3  |
| <sup>13</sup> C NMR spectra of <b>1</b> ..... | S4  |
| <sup>1</sup> H NMR spectra of <b>2</b> .....  | S5  |
| <sup>13</sup> C NMR spectra of <b>2</b> ..... | S6  |
| <sup>1</sup> H NMR spectra of <b>3</b> .....  | S7  |
| <sup>13</sup> C NMR spectra of <b>3</b> ..... | S8  |
| Mass Spectrum of <b>2</b> .....               | S9  |
| Mass Spectrum of <b>3</b> .....               | S10 |

## General

All reagents were purchased from commercial sources and used without treatment, unless otherwise indicated. The products were purified by column chromatography over silica gel.  $^1\text{H}$  NMR and  $^{13}\text{C}$  NMR spectra were recorded at 25 °C at 300 MHz and 75 MHz, respectively, with TMS as internal standard. Abbreviations for signal coupling are as follows: s, singlet; d, doublet; t, triplet; q, quartet; m, multiplet; br, broad. Column chromatography was performed using  $\text{SiO}_2$  (0.040 – 0.063 mm, 230 – 400 mesh ASTM) from Merck. All reagents were obtained from commercial sources. Mass spectra were recorded on Varian MS mass spectrometer.

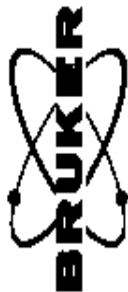

Current Data Parameters  
NAME ME 51 970-00  
EXPNO 15  
PROCNO 1

F2 - Acquisition Parameters  
Date\_ Time 20120113  
Time 21.52  
INSTRUM spect.  
PROBHD 5 mm N1 1H/13  
PULPROG zgpg30  
TD 65536  
SOLVENT CDCl3  
NS 64  
DS 4  
SWH 6172.639 Hz  
FIDRES 0.376760 Hz  
AQ 1.327540 Hz  
RG 143.7  
DX 81.000 Hz  
DE 6.000 Hz  
TE 300.0 K  
F2 1.50000000 Hz

===== CHANNEL f1 =====  
NUC1 13C  
P1 10.00 Hz  
PL1 0.00 dB  
SFO1 300.131320 MHz

F2 - Processing parameters  
SI 16384  
SF 300.130000 MHz  
WDW EM  
SSB 0  
LA 0  
GB 0  
PC 1.00

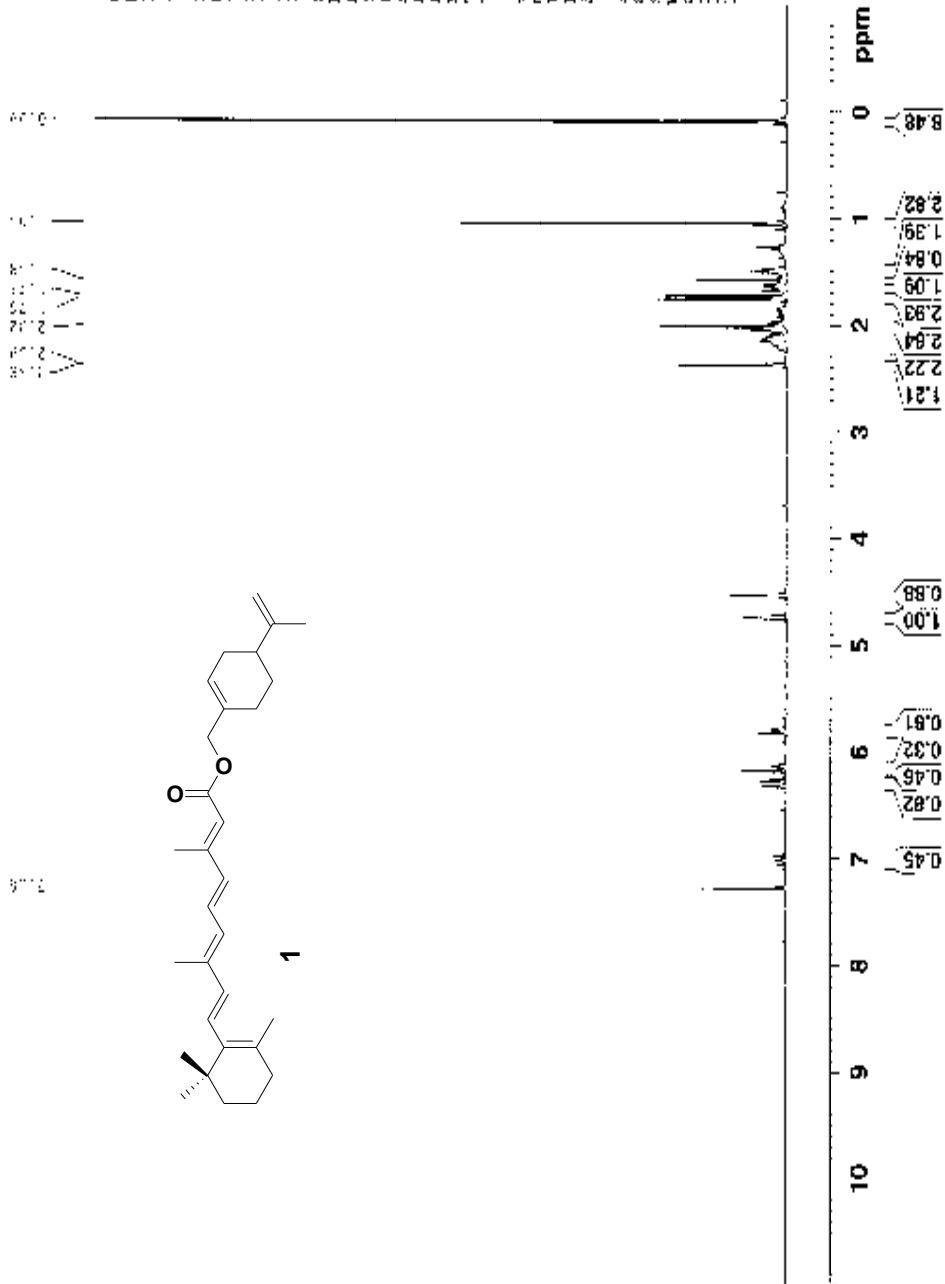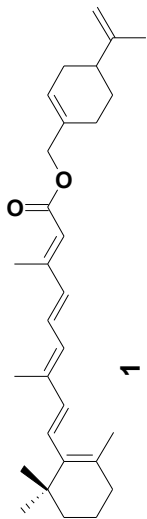

30 61212

1.73

1.73

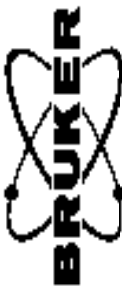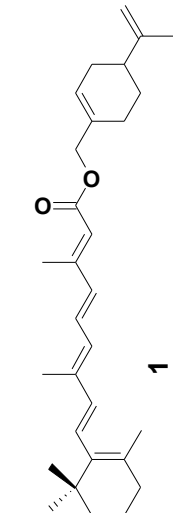

Current Data Parameters  
 Date: 01-24-2009  
 Time: 14:45  
 Operator: [unreadable]  
 Sample: [unreadable]  
 Acquisition Parameters  
 Date: 01-24-2009  
 Time: 14:45  
 Operator: [unreadable]  
 Sample: [unreadable]  
 Solvent: CDCl3  
 P1: 12.00  
 F1: 101.625  
 A1: 30.00  
 SFO: 1.00  
 AQ: 1.00  
 RG: 327.681  
 LW: 5.00  
 FX: 1.00  
 IS: 320.00  
 US: 2.00000000  
 UT: 0.00000000

----- CHANNEL f1 -----  
 NU1 13C  
 F1 101.625  
 EQ 320.00  
 LNU1 75.477500  
 CHANNEL f2 -----  
 CPDPRG2 MLEV2  
 SOLC 13  
 P1 12.00  
 F1 101.625  
 SFO 1.00  
 AQ 1.00  
 RG 327.681  
 LW 5.00  
 FX 1.00  
 IS 320.00  
 US 2.00000000  
 UT 0.00000000

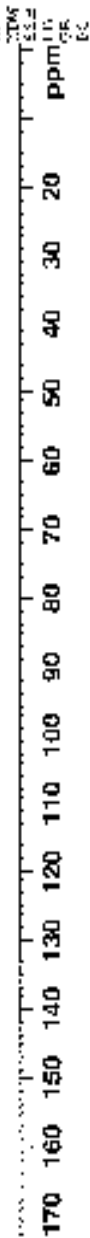

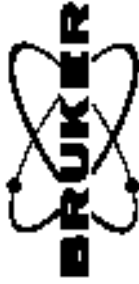

Current Date: Parameters  
 NAME: XE 40 11.06.04  
 THEORY: 45  
 PROCNO: 1

RF - Bruker Application Parameters  
 DATE\_: 20081126  
 TIME\_: 11:33  
 OPERATOR: jll  
 SAMPLE: 20081126  
 SOLVENT: CHCl3  
 PULPROG: zgpg30  
 ACQ: 15384  
 SOLID: 1  
 NS: 1  
 DS: 4  
 SWH: 5172.847 Hz  
 FIDRES: 0.127000 Hz  
 AQ: 3.1200000 sec  
 RG: 128  
 LB: 81.000 Hz  
 GB: 0.00 Hz  
 TE: 300.2 K  
 D1: 1.56500000 sec

----- CHANNEL f1 -----  
 NUCL1: 1H  
 P1: 10.00 usec  
 PL1: 0.00 dB  
 SFO1: 500.131420 MHz  
 V2: Processing channel v2  
 ST: 16.000 usec  
 SF: 300.1303000 MHz  
 WDW: EM  
 SSB: 0  
 GB: 0.00 Hz  
 PC: 1.00

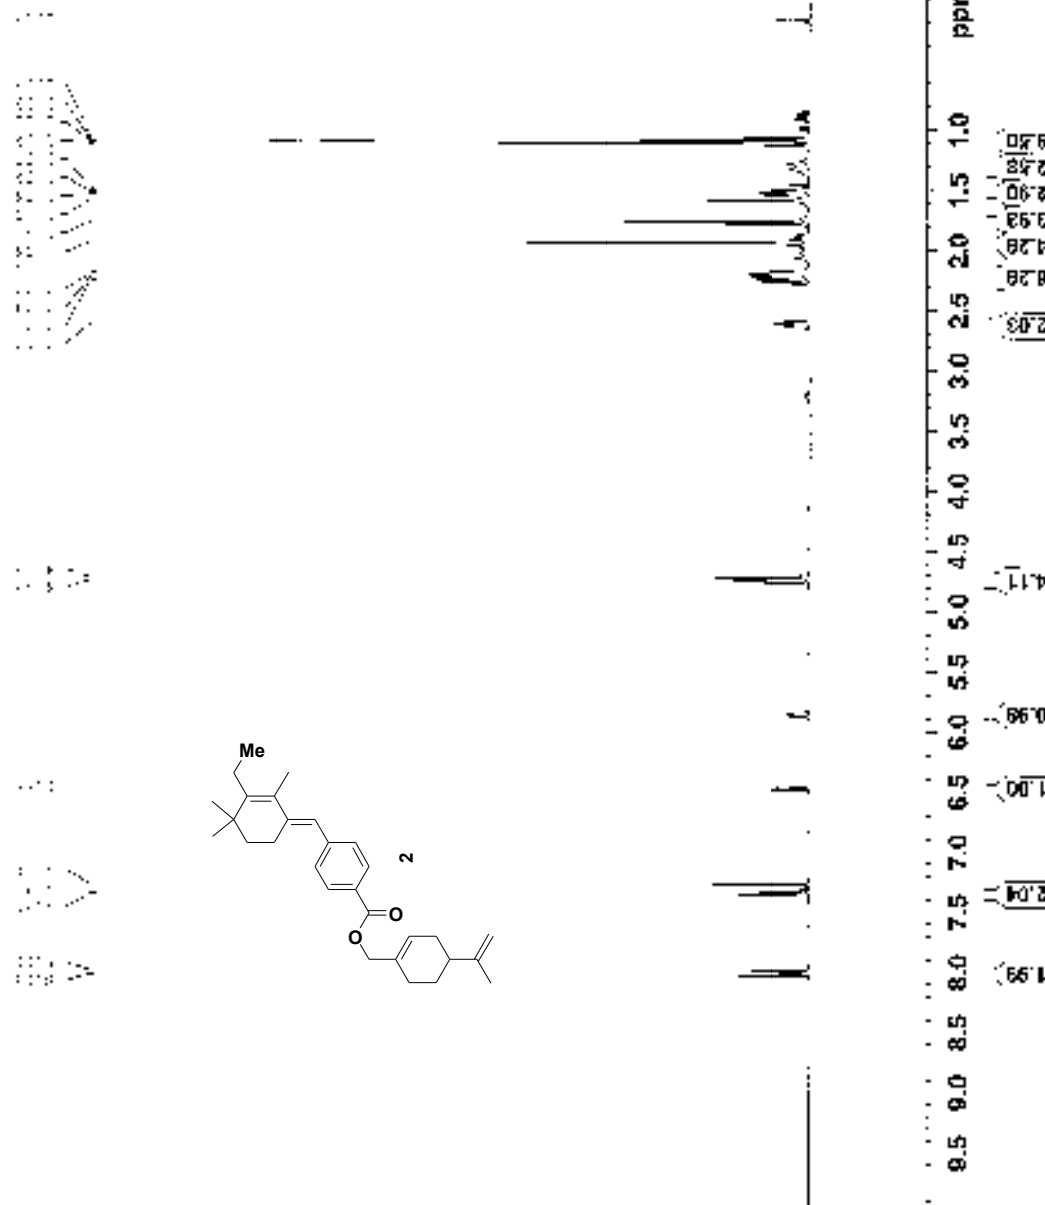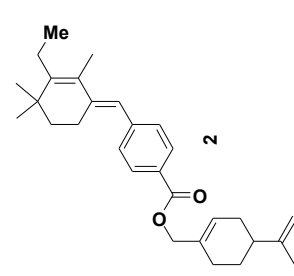

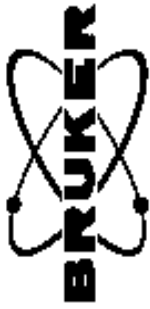

Current Data Parameters  
 NAME: M2-0-11-carbon  
 APMO: 45  
 PRGEO: 1

F2 Acquisition Parameters  
 Date\_: 20091106  
 Time: 17.41  
 INSTRUM: spect  
 PROGRAM: hmqc  
 PULPROG: zgpg30  
 TD: 65536  
 SOLVENT: CDCl3  
 NS: 4347  
 DS: 4  
 SWH: 23889.520 Hz  
 FIDRES: 0.363324 Hz  
 AQ: 0.1763051 sec  
 RG: 2096.2  
 LW: 21.020 Hz  
 LF: 6.50 Hz  
 TF: 300.0 K  
 D1: 0.00000000 sec  
 d11: 0.00000000 sec

===== CHANNEL f1 =====  
 NUCL: 13C  
 P1: 12.35 Hz  
 PL1: 0.00 dB  
 SFO1: 75.4772501 MHz

===== CHANNEL f2 =====  
 CPDPRG2: waltz16  
 CH2: 2  
 INPRG2: zgpg30  
 PL2: 0.00 dB  
 PL12: 0.00 dB  
 SFO2: 300.1312500 MHz

F2 Processing Parameters  
 SI: 32768  
 SF: 75.4677190 MHz  
 SCA: 0  
 GBW: 0  
 SSB: 0  
 LB: 2.00 Hz  
 GB: 0  
 TC: 0.00

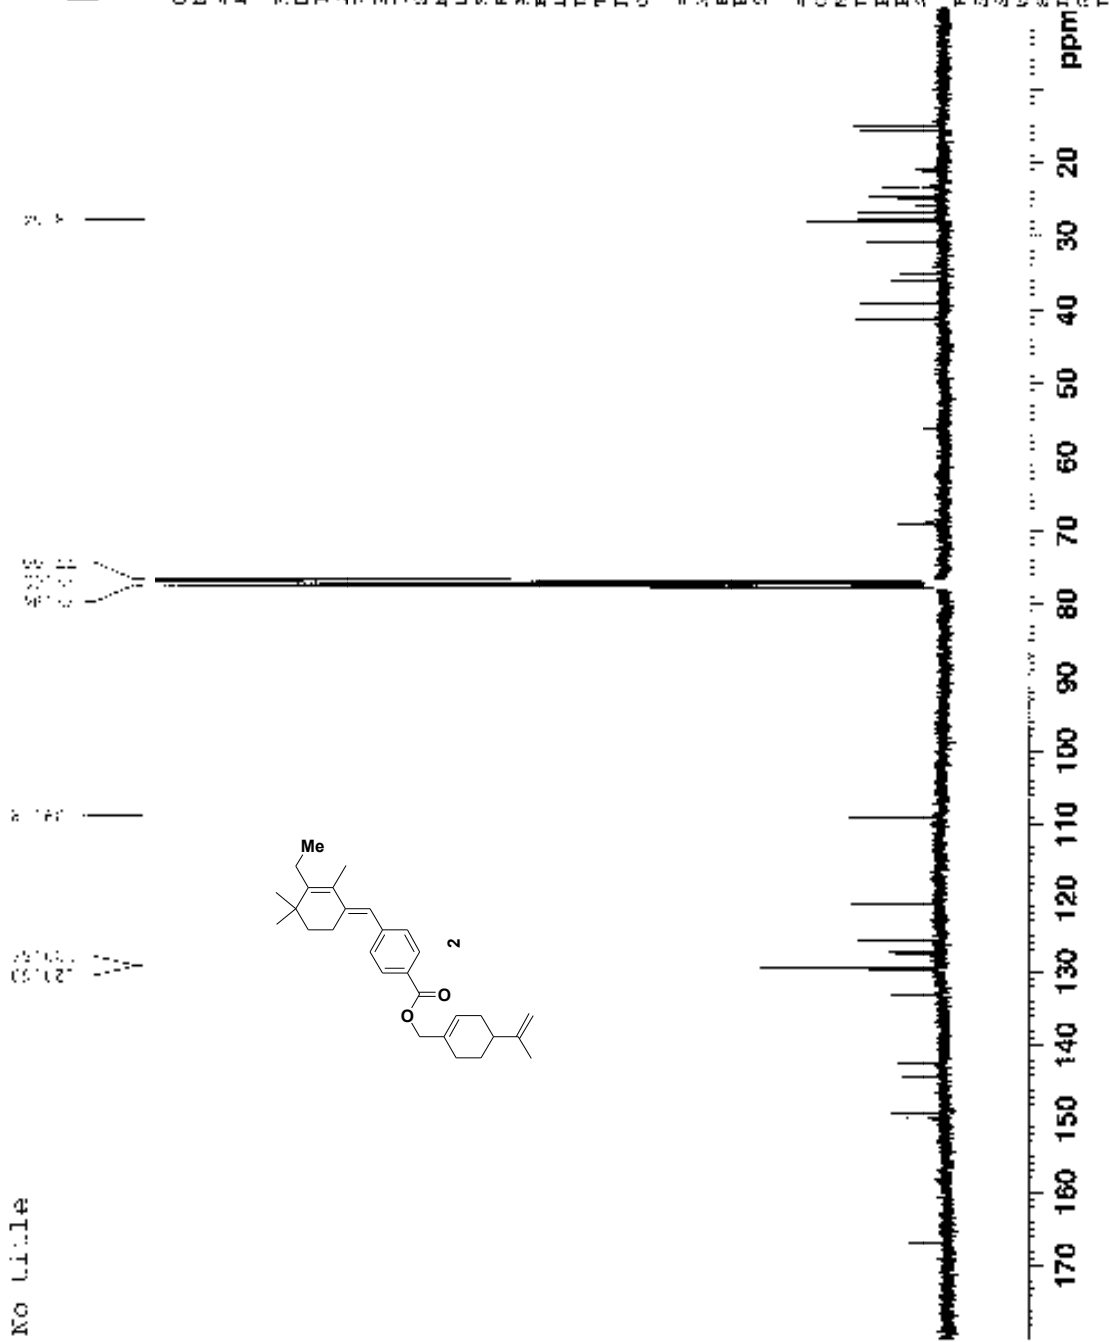

No title

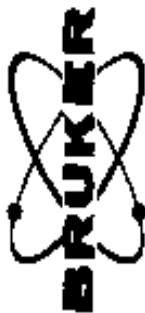

Current Data Parameters  
 NAME EG-df-a-proton  
 EXPT 45  
 PROCNO 1

F2 Acquisition Parameters  
 Date\_ 20051117  
 Time 16.53  
 LEGACY SPEC1  
 PULPROG 5 mm hzgpinch  
 PULPROG2 zgpg30  
 WIL 16584  
 SOLVENT CDCl3  
 NS 8  
 DS 4  
 SWH 6100.339 HZ  
 FIDRES 0.476760 HZ  
 AQ 1.3271500 S  
 RG 181  
 LA 5.000 W  
 DE 6.00 W  
 TE 320.0 K  
 D1 1.5000000 S

===== CHANNEL f1 =====  
 NUC1 1H  
 P1 12.00 U  
 F1 500.136091  
 SFO1 500.136092 MHz  
 F2 Processing parameters:  
 G1 16384  
 S1 500.1360903 MHz  
 SFO2 500.1360903 MHz  
 LE 0.31 Hz  
 OF 0.00 Hz

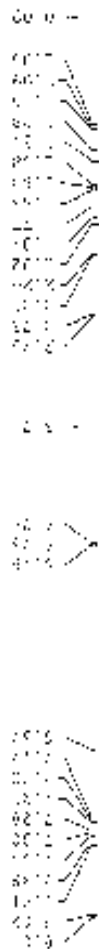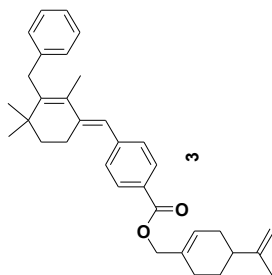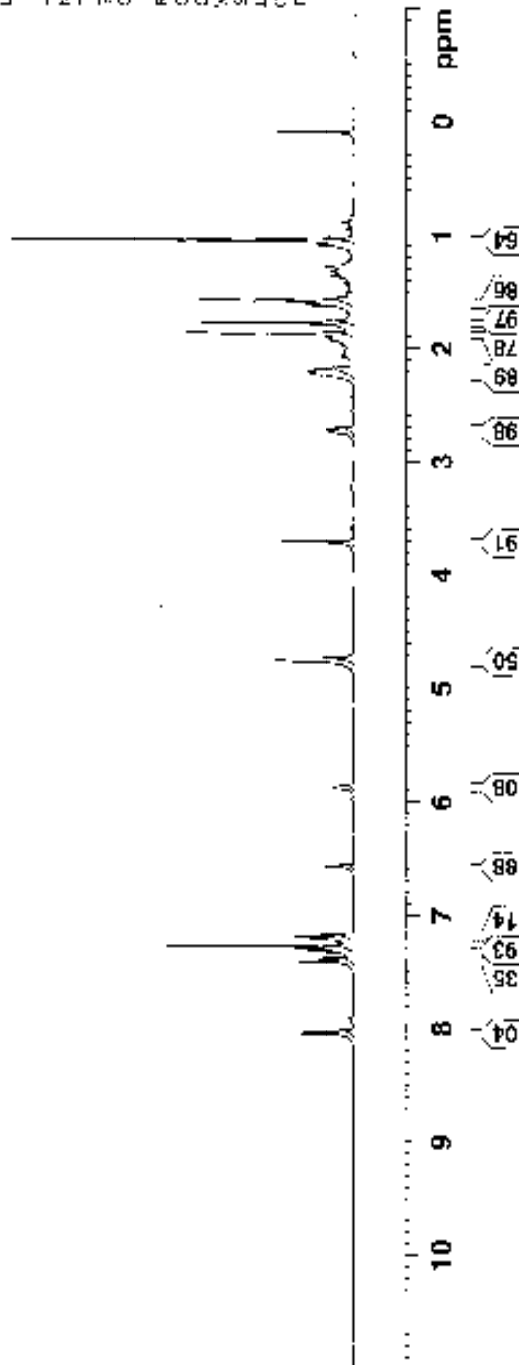

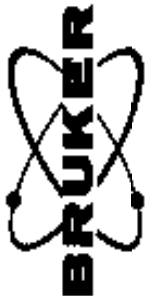

No title

13C NMR  
125.00 MHz  
CDCl3

13C NMR  
125.00 MHz  
CDCl3

13C NMR  
125.00 MHz  
CDCl3

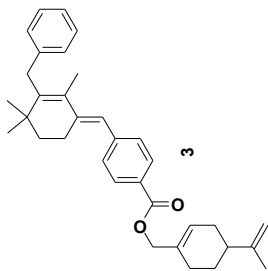

Current Data Parameters  
 NAME MG-19-b-carbon  
 EXPNO 4  
 PROCES 1

F2 Acquisition Parameters  
 Date\_ Time 2009-11-18 18:21  
 INSTRUM spect  
 PROBRG 5 mm Multichannel  
 PULPROG zgpg30  
 TC 65.00  
 SOLVENT CDCl3  
 NS 1287  
 DS 4  
 SWH 23409.123 Hz  
 FIDRES 0.345394 Hz  
 AQ 1.1176304 s  
 RG 2896.1  
 LW 2.1050 Hz  
 DQ 3.70 Hz  
 TE 300.2 K  
 F1 100.626126 MHz  
 F2 125.7611500 MHz

----- CHANNEL f2 -----  
 NUC1 13C  
 P1 12.50 Hz  
 PC1 5.00 dB  
 SFO1 75.4772501 MHz

----- CHANNEL f1 -----  
 CPDPRG2 waltz16  
 NU1 1H  
 PCPD 100.00 Hz  
 PC1 5.00 dB  
 P12 21.00 dB  
 SFO2 300.1512300 MHz

F2 - Processing parameters  
 SI 32768  
 SF 75.4677190 MHz  
 DS 4  
 SFR 18.8674300 MHz  
 GD 0  
 PC 1.03

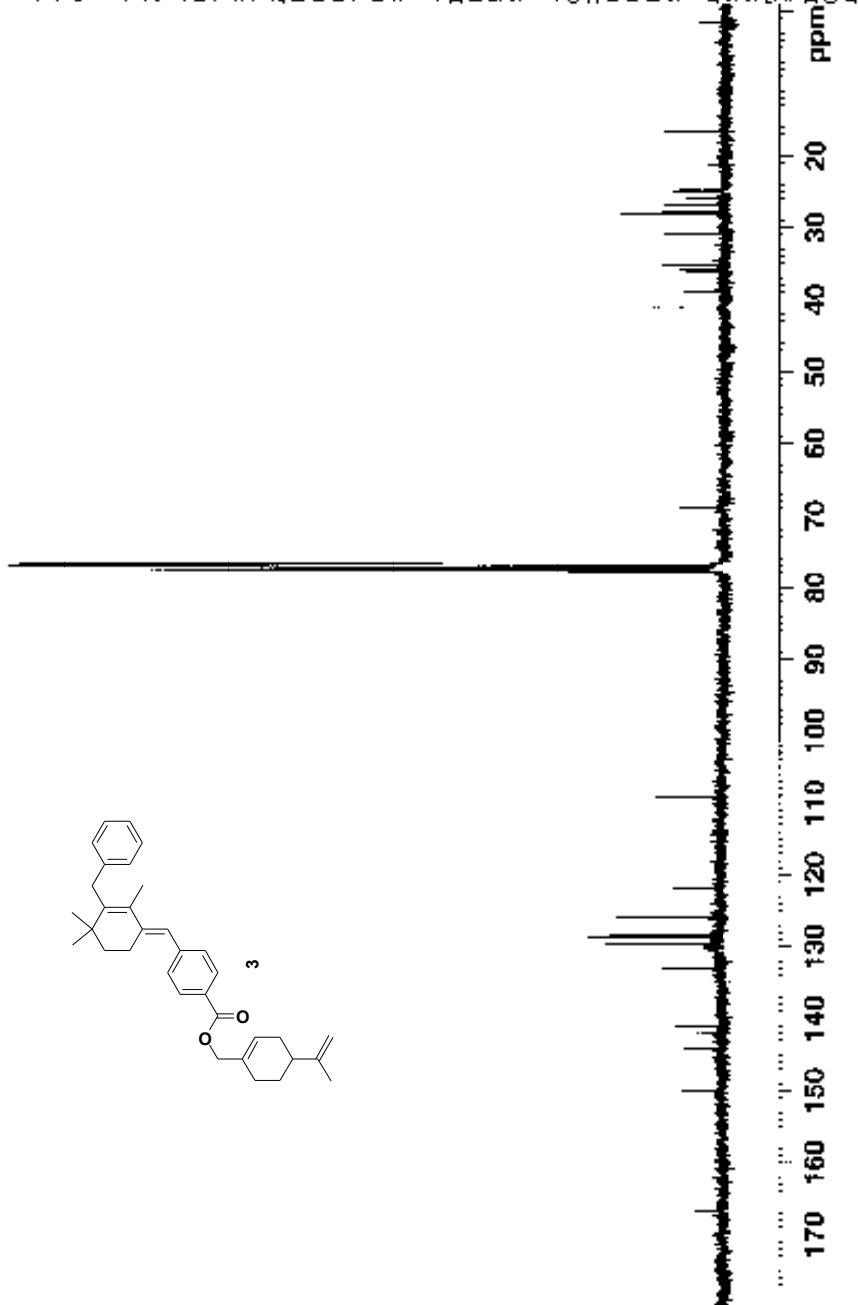



BasePeak: 25.380

Mode: Positive  
Scans: 5  
Totlnt: 92.21

Date: 10-NOV-2009  
Time: 17:24:38  
Scale: 6.2264

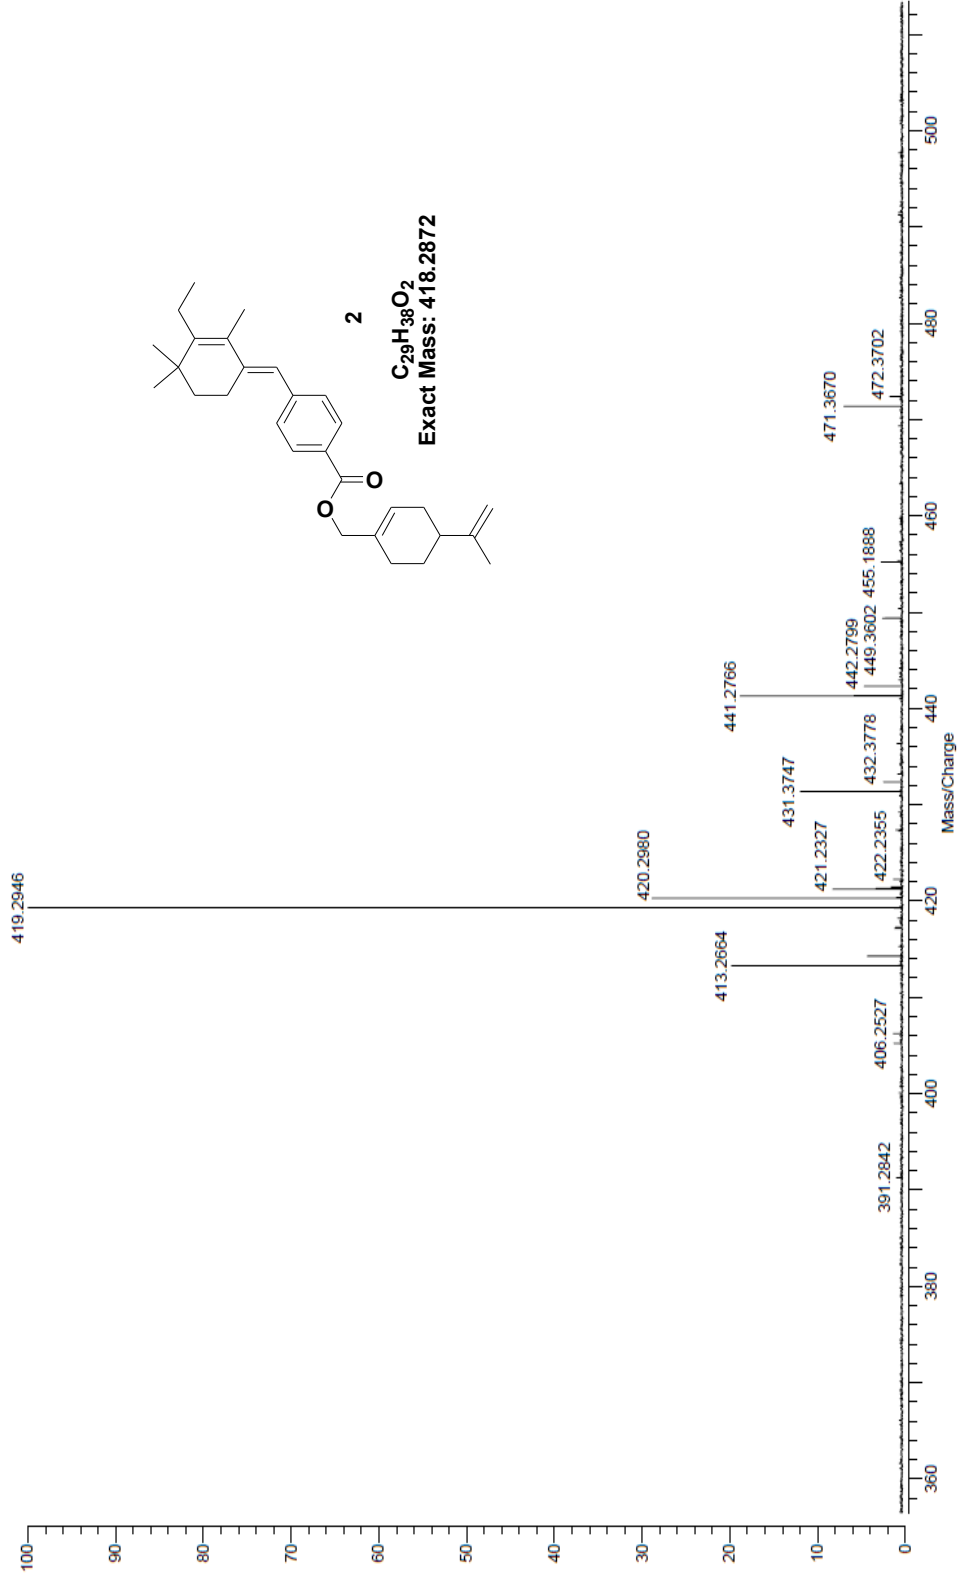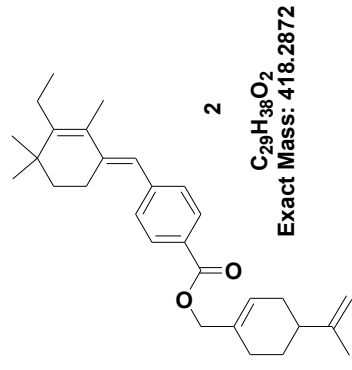

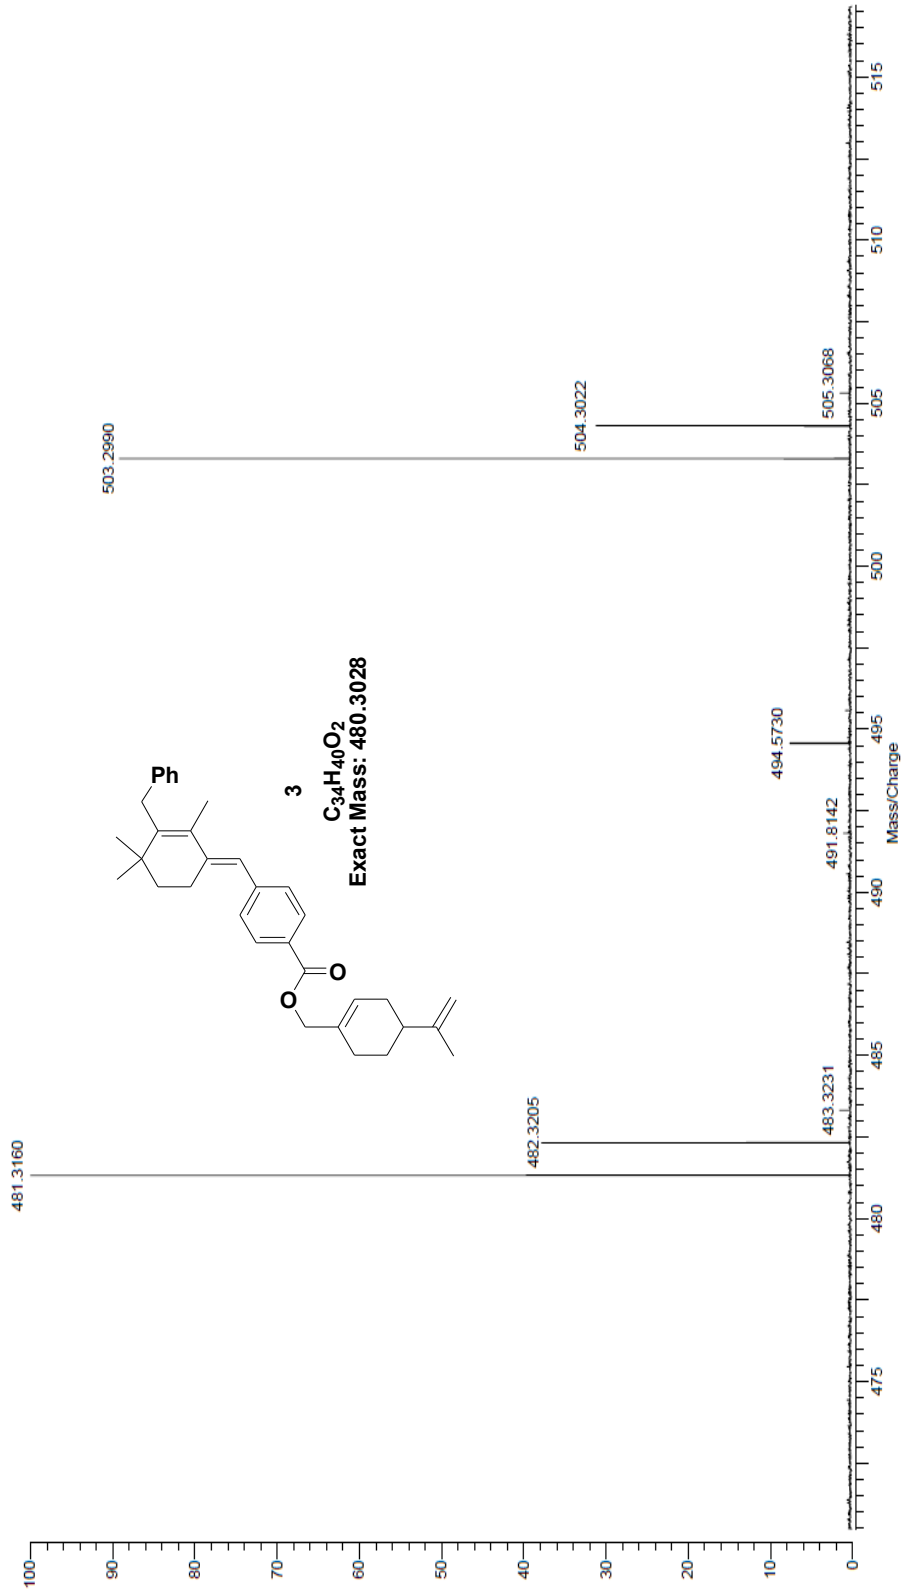

Supplement: NIHMS171231-supplement-01.pdf [file NIHMS171231-supplement-01.pdf]
